# Supplementary material
Source: PubMed Central journal article supplement (PMC6035088)
Supplement: NIHMS952785-supplement-3.pdf [file NIHMS952785-supplement-3.pdf]

| <b>Supplementary Table 1. Summary of the Most Commonly Reported Related Adverse Events</b> |                |          |                |          |                |          |
|--------------------------------------------------------------------------------------------|----------------|----------|----------------|----------|----------------|----------|
| <b>Adverse Events (N=6)<sup>1</sup></b>                                                    | <b>Grade 1</b> |          | <b>Grade 2</b> |          | <b>Grade 3</b> |          |
|                                                                                            | <b>No.</b>     | <b>%</b> | <b>No.</b>     | <b>%</b> | <b>No.</b>     | <b>%</b> |
| Fatigue                                                                                    | 1              | 17%      | 3              | 50%      | 0              | 0%       |
| Dysgeusia                                                                                  | 3              | 50%      | 0              | 0%       | 0              | 0%       |
| Abdominal pain                                                                             | 0              | 0%       | 2              | 33%      | 1              | 17%      |
| Epigastric pain                                                                            | 0              | 0%       | 1              | 17%      | 0              | 0%       |
| Back pain                                                                                  | 0              | 0%       | 0              | 0%       | 1              | 17%      |
| Pain - other                                                                               | 1              | 17%      | 1              | 17%      | 0              | 0%       |
| Anorexia                                                                                   | 0              | 0%       | 1              | 17%      | 0              | 0%       |
| Chills                                                                                     | 1              | 17%      | 0              | 0%       | 0              | 0%       |
| Dehydration                                                                                | 1              | 17%      | 0              | 0%       | 0              | 0%       |
| Diarrhea                                                                                   | 1              | 17%      | 0              | 0%       | 0              | 0%       |
| Disseminated intravascular coagulation                                                     | 0              | 0%       | 1              | 17%      | 0              | 0%       |
| Dysphasia                                                                                  | 0              | 0%       | 1              | 17%      | 0              | 0%       |
| Gastritis                                                                                  | 0              | 0%       | 0              | 0%       | 1              | 17%      |
| Gastrointestinal disorder - other                                                          | 2              | 33%      | 0              | 0%       | 0              | 0%       |
| Hematoma                                                                                   | 1              | 17%      | 0              | 0%       | 0              | 0%       |
| Bacteremia                                                                                 | 0              | 0%       | 1              | 17%      | 0              | 0%       |
| Cerebral vascular accident                                                                 | 0              | 0%       | 1              | 17%      | 0              | 0%       |
| Deep venous thrombosis                                                                     | 0              | 0%       | 1              | 17%      | 0              | 0%       |

<sup>1</sup>Adverse events were defined as "not related", "unlikely related", "possibly related", "probably related", or "definitely related". Adverse events that were "not related" are not shown. No adverse events were categorized as "probably related" or "definitely related".
